# Supplementary material for: The Microbiome-Gut-Brain axis regulates social cognition & craving in young binge drinkers
Source: PubMed Central journal article supplement (PMC10025767; doi:10.1016/j.ebiom.2023.104442), 2023-02-02
Supplement: mmc1.pdf [file mmc1.pdf]

**Table 1.** Regression coefficients for social cognition and drinking variables.

| Predictors     | Unstandardized coefficients |           | Standardized coefficients |  | <i>t</i> | <i>p</i> | Model                                             |
|----------------|-----------------------------|-----------|---------------------------|--|----------|----------|---------------------------------------------------|
|                | <i>B</i>                    | <i>SE</i> | $\beta$                   |  |          |          |                                                   |
| Maximum drinks | -.133                       | .058      | -.269                     |  | -2.272   | .026     | <b>ERT</b><br>Correct responses sadness           |
| Maximum drinks | -.210                       | .065      | -.370                     |  | -3.240   | .002     | Correct responses disgust                         |
| Total drinks   | .684                        | .172      | .442                      |  | 3.976    | .001     | <b>AGN</b><br>Total latency for correct responses |

Gender and psychopathology (STAI trait and BDI) were included as covariables

**Table 3.** Regression coefficients for short chain fatty acids and drinking variables.

| Predictors              | Unstandardized coefficients |           | Standardized coefficients | <i>t</i> | <i>p</i> | Model       |
|-------------------------|-----------------------------|-----------|---------------------------|----------|----------|-------------|
|                         | <i>B</i>                    | <i>SE</i> | $\beta$                   |          |          |             |
| Coffee                  | 4.037                       | 1.574     | .299                      | 2.566    | .013     | Acetate     |
| High fat dairy products | 4.016                       | 1.541     | 2.97                      | 2.606    | .011     | Propionate  |
| BMI                     | .909                        | .415      | .250                      | 2.191    | .032     |             |
| Processed meats         | .535                        | .218      | .290                      | 2.460    | .017     | Isobutyrate |
| Grains                  | 4.843                       | .816      | .407                      | 3.789    | .001     | Butyrate    |
| Maximum drinks          | 1.278                       | .247      | .354                      | 3.299    | .002     |             |
| Maximum drinks          | -.031                       | .013      | -.278                     | -2.349   | .022     | Isovalerate |

## PERMANOVA

```
s2(dist.clr ~ MaxDrinks_Tertiles, data = metadata, method = "euclidean", permutations = 1000)
```

Permutation test for adonis under reduced model

Terms added sequentially (first to last)

Permutation: free

Number of permutations: 1000

```
adonis2(formula = dist.clr ~ MaxDrinks_Tertiles, data = metadata, permutations = 1000,  
method = "euclidean")
```

|                    | Df | SumOfSqs | R2      | F      | Pr(>F)      |
|--------------------|----|----------|---------|--------|-------------|
| MaxDrinks_Tertiles | 1  | 2897     | 0.02295 | 1.5969 | 0.006993 ** |
| Residual           | 68 | 123353   | 0.97705 |        |             |
| Total              | 69 | 126250   | 1.00000 |        |             |

---

Signif. codes: 0 '\*\*\*' 0.001 '\*\*' 0.01 '\*' 0.05 '.' 0.1 ' ' 1

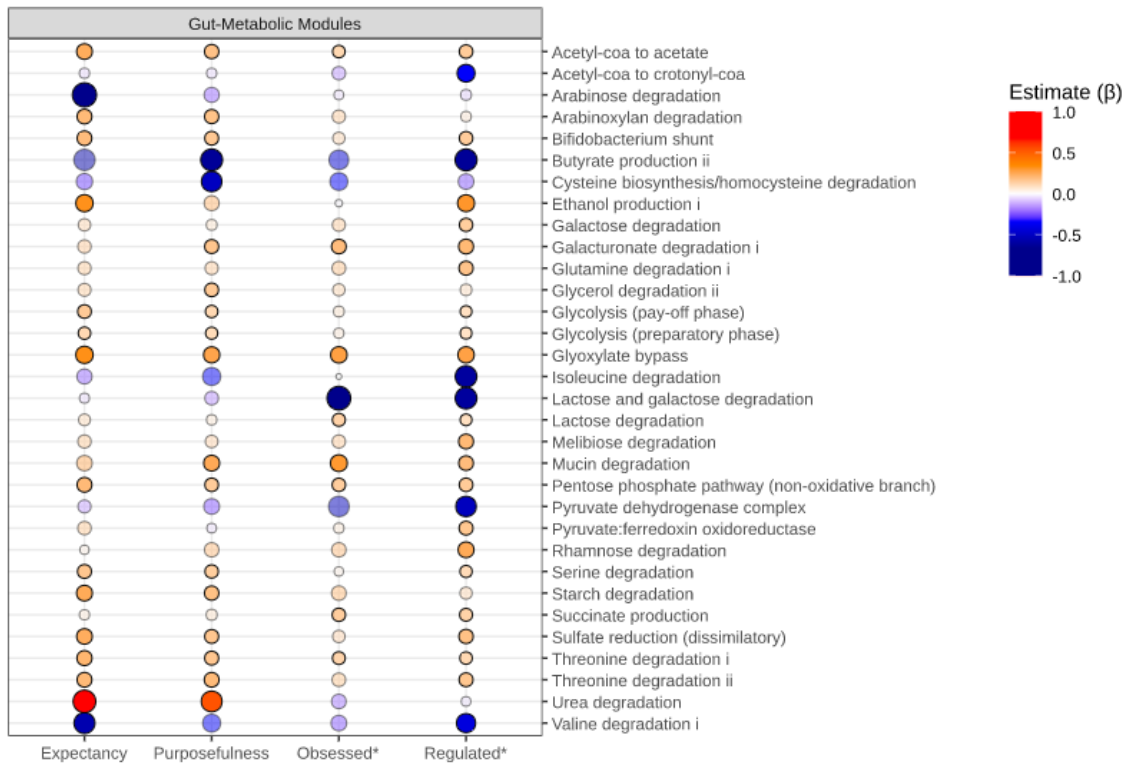

**Figure 1. Gut metabolic modules and craving.** A number of gut-metabolic modules showed associations with craving, such as reduced butyrate production, cysteine degradation, increased glyoxylate bypass, acetyl-coa to acetate, ethanol production. Craving dimensions at baseline that showed significant associations were expectancy and purposefulness, while obsessed and regulated were significant at follow-up.
